# Supplementary material for: Reserve Design under Climate Change: From Land Facets Back to Ecosystem Representation
Source: PLoS One. 2015 May 15;10(5):e0126918. doi: 10.1371/journal.pone.0126918 (PMC4433178; doi:10.1371/journal.pone.0126918)
Supplement: S1 Data — (XLSX) [file pone.0126918.s001.xlsx]

## Sheet: Reserve 1
Natural Subregion Extent as Percentage of Alberta						Percent of Each Subregion Within Protected Areas
							(20 % target; no clumping)
Subregion	Today	2020	2050	2080		Today	2020	2050	2080
Central Mixedwood	25.3395	21.8977	9.71389	0.7762		19.9713	22.725	24.4286	75.0729
Dry Mixedwood	12.8714	25.3638	24.5636	3.45358		19.9217	21.0387	21.7566	36.5555
Lower Highlands	8.39301	2.9738	1.28134	0		19.9691	27.5274	58.7397	NA
Upper Highlands	1.78844	0.958817	0.151527	0		20.1266	59.342	88.6454	NA
Subarctic	1.78663	0.3595	0	0		54.4095	81.906	NA	NA
Foothills Parkland	0.59313	0.29898	0.133115	0.386666		4.42748	3.98788	10.2041	36.8852
Central Parkland	8.57563	15.3814	22.0486	21.6233		0.350223	7.60928	20.1915	22.6637
Dry Grassland	7.08405	8.63132	13.9968	28.6047		0	0	0	5.69406
MixedGrassland	5.28248	5.22769	8.89755	24.3215		0	0.0577401	1.74034	18.299
Foothills Fescue	2.05769	0.188504	1.22535	9.56267		4.42748	2.16173	14.62	19.8261
Lower Foothills	6.77511	4.94426	5.4657	0.389232		0	21.3675	20.1767	39.1237
Upper Foothills	3.38099	2.22084	1.17856	0.285246		19.8688	24.4852	31.2332	65.873
Subalpine	3.66971	3.39865	3.4726	2.46458		60.1152	68.5776	77.0351	86.834
Alpine	2.28196	1.88232	1.12544	0.281623		86.8386	88.831	90.063	93.7835
Montane	1.32103	1.9359	2.40934	3.5141		28.1618	28.5102	32.1912	49.2527

## Sheet: Reserve 2
Natural Subregion Extent as Percentage of Alberta						Percent of Each Subregion Within Protected Areas
							(20 % target; max clumping)
Subregion	Today	2020	2050	2080		Today	2020	2050	2080
Central Mixedwood	25.3395	21.8977	9.71389	0.7762		20.0154	23.3378	23.5244	95.5473
Dry Mixedwood	12.8714	25.3638	24.5636	3.45358		19.9897	21.6325	23.0168	41.415
Lower Highlands	8.39301	2.9738	1.28134	0		20.0284	28.0907	76.0542	NA
Upper Highlands	1.78844	0.958817	0.151527	0		21.0042	77.4437	99.8008	NA
Subarctic	1.78663	0.3595	0	0		70.6707	98.9924	NA	NA
Foothills Parkland	0.59313	0.29898	0.133115	0.386666		4.42748	3.98788	8.95692	37.4707
Central Parkland	8.57563	15.3814	22.0486	21.6233		0.350223	6.91655	19.9807	22.8396
Dry Grassland	7.08405	8.63132	13.9968	28.6047		0	0	0	5.4102
MixedGrassland	5.28248	5.22769	8.89755	24.3215		0	0.0577401	1.88113	18.8364
Foothills Fescue	2.05769	0.188504	1.22535	9.56267		4.42748	1.84147	7.98128	19.5688
Lower Foothills	6.77511	4.94426	5.4657	0.389232		0	24.6764	23.8879	48.0807
Upper Foothills	3.38099	2.22084	1.17856	0.285246		19.9446	20.4689	32.9107	76.7196
Subalpine	3.66971	3.39865	3.4726	2.46458		63.6685	73.5956	83.0805	93.3864
Alpine	2.28196	1.88232	1.12544	0.281623		92.7381	94.4115	94.475	95.6056
Montane	1.32103	1.9359	2.40934	3.5141		30.3667	26.2103	28.4202	52.3965

## Sheet: Reserve 3
Natural Subregion Extent as Percentage of Alberta						Percent of Each Subregion Within Protected Areas
							(15 % target; no clumping)
Subregion	Today	2020	2050	2080		Today	2020	2050	2080
Central Mixedwood	25.3395	21.8977	9.71389	0.7762		15.0099	19.7152	19.317	73.5952
Dry Mixedwood	12.8714	25.3638	24.5636	3.45358		15.0122	15.243	18.7613	31.9801
Lower Highlands	8.39301	2.9738	1.28134	0		15.0366	22.026	57.4676	NA
Upper Highlands	1.78844	0.958817	0.151527	0		15.2996	57.8782	88.6454	NA
Subarctic	1.78663	0.3595	0	0		51.8162	81.2762	NA	NA
Foothills Parkland	0.59313	0.29898	0.133115	0.386666		4.42748	3.53357	9.52381	36.7291
Central Parkland	8.57563	15.3814	22.0486	21.6233		0.350223	5.85782	14.1569	20.121
Dry Grassland	7.08405	8.63132	13.9968	28.6047		0	0	0	4.63935
MixedGrassland	5.28248	5.22769	8.89755	24.3215		0	0.0577401	1.56054	12.443
Foothills Fescue	2.05769	0.188504	1.22535	9.56267		4.42748	1.84147	10.7772	15.0676
Lower Foothills	6.77511	4.94426	5.4657	0.389232		0	17.6862	16.8052	32.2218
Upper Foothills	3.38099	2.22084	1.17856	0.285246		15.1103	17.4108	26.7384	65.3439
Subalpine	3.66971	3.39865	3.4726	2.46458		59.4407	68.3689	77.109	87.079
Alpine	2.28196	1.88232	1.12544	0.281623		87.123	89.1758	90.4922	94.0514
Montane	1.32103	1.9359	2.40934	3.5141		27.8533	26.6703	28.7585	48.3079

## Sheet: Reserve 4
Natural Subregion Extent as Percentage of Alberta						Percent of Each Subregion Within Protected Areas
							(15 % target; max clumping)
Subregion	Today	2020	2050	2080		Today	2020	2050	2080
Central Mixedwood	25.3395	21.8977	9.71389	0.7762		15.8312	19.7104	21.169	95.1585
Dry Mixedwood	12.8714	25.3638	24.5636	3.45358		15.0216	16.4498	19.2609	45.0072
Lower Highlands	8.39301	2.9738	1.28134	0		14.997	29.9533	86.2544	NA
Upper Highlands	1.78844	0.958817	0.151527	0		19.2405	89.9732	100	NA
Subarctic	1.78663	0.3595	0	0		80.6048	100	NA	NA
Foothills Parkland	0.59313	0.29898	0.133115	0.386666		4.42748	3.53357	10.0907	36.0656
Central Parkland	8.57563	15.3814	22.0486	21.6233		0.350223	5.13958	14.6997	20.0973
Dry Grassland	7.08405	8.63132	13.9968	28.6047		0	0	0	4.21672
MixedGrassland	5.28248	5.22769	8.89755	24.3215		0	0.051966	1.22299	13.7225
Foothills Fescue	2.05769	0.188504	1.22535	9.56267		4.42748	1.84147	8.7326	15.3075
Lower Foothills	6.77511	4.94426	5.4657	0.389232		0	19.9969	19.5057	46.1031
Upper Foothills	3.38099	2.22084	1.17856	0.285246		14.7442	14.5498	26.764	67.3545
Subalpine	3.66971	3.39865	3.4726	2.46458		61.4436	71.1399	80.6858	91.4636
Alpine	2.28196	1.88232	1.12544	0.281623		90.754	92.7758	93.2681	95.3376
Montane	1.32103	1.9359	2.40934	3.5141		28.5045	24.9942	25.7642	48.0502

## Sheet: Reserve 5
Natural Subregion Extent as Percentage of Alberta						Percent of Each Subregion Within Protected Areas
							(20 % target; no clumping)
Subregion	Today	2020	2050	2080		Today	2020	2050	2080
Central Mixedwood	25.3395	21.8977	9.71389	0.7762		29.993	29.223	30.676	96.7334
Dry Mixedwood	12.8714	25.3638	24.5636	3.45358		30.0209	33.1275	30.8169	53.8566
Lower Highlands	8.39301	2.9738	1.28134	0		30.0336	36.7844	86.2544	NA
Upper Highlands	1.78844	0.958817	0.151527	0		30.692	89.9732	100	NA
Subarctic	1.78663	0.3595	0	0		80.6048	100	NA	NA
Foothills Parkland	0.59313	0.29898	0.133115	0.386666		4.42748	5.19939	8.95692	37.4707
Central Parkland	8.57563	15.3814	22.0486	21.6233		0.376621	11.8167	31.121	28.5099
Dry Grassland	7.08405	8.63132	13.9968	28.6047		0	0	0	7.95437
MixedGrassland	5.28248	5.22769	8.89755	24.3215		0	0.0577401	2.19493	30.248
Foothills Fescue	2.05769	0.188504	1.22535	9.56267		4.42748	6.08487	19.8423	27.872
Lower Foothills	6.77511	4.94426	5.4657	0.389232		0	33.1807	31.7603	54.2071
Upper Foothills	3.38099	2.22084	1.17856	0.285246		30.3901	28.3792	39.2112	79.2593
Subalpine	3.66971	3.39865	3.4726	2.46458		66.3006	75.6117	84.6017	93.6497
Alpine	2.28196	1.88232	1.12544	0.281623		93.168	94.5558	94.475	95.6056
Montane	1.32103	1.9359	2.40934	3.5141		30.5838	34.4897	38.8374	57.5116

## Sheet: Reserve 6
Natural Subregion Extent as Percentage of Alberta						Percent of Each Subregion Within Protected Areas
							(20 % target; max clumping)
Subregion	Today	2020	2050	2080		Today	2020	2050	2080
Central Mixedwood	25.3395	21.8977	9.71389	0.7762		29.9513	29.8385	31.9858	75.1507
Dry Mixedwood	12.8714	25.3638	24.5636	3.45358		30.0045	31.5066	29.9241	42.643
Lower Highlands	8.39301	2.9738	1.28134	0		29.9779	34.2722	59.0459	NA
Upper Highlands	1.78844	0.958817	0.151527	0		30.3038	59.3735	88.6454	NA
Subarctic	1.78663	0.3595	0	0		54.7728	81.906	NA	NA
Foothills Parkland	0.59313	0.29898	0.133115	0.386666		4.42748	4.34124	10.771	39.6956
Central Parkland	8.57563	15.3814	22.0486	21.6233		0.582531	12.1297	30.5406	29.5073
Dry Grassland	7.08405	8.63132	13.9968	28.6047		0	0	0	8.09155
MixedGrassland	5.28248	5.22769	8.89755	24.3215		0	0.0692881	2.80558	28.7743
Foothills Fescue	2.05769	0.188504	1.22535	9.56267		4.42748	2.16173	13.5854	28.6848
Lower Foothills	6.77511	4.94426	5.4657	0.389232		0	31.6239	31.3682	49.4378
Upper Foothills	3.38099	2.22084	1.17856	0.285246		31.4079	34.4954	38.0458	68.6243
Subalpine	3.66971	3.39865	3.4726	2.46458		61.4888	70.0964	78.5084	87.8628
Alpine	2.28196	1.88232	1.12544	0.281623		87.9167	89.8813	91.0822	94.8017
Montane	1.32103	1.9359	2.40934	3.5141		29.7384	35.4331	39.7394	54.574
